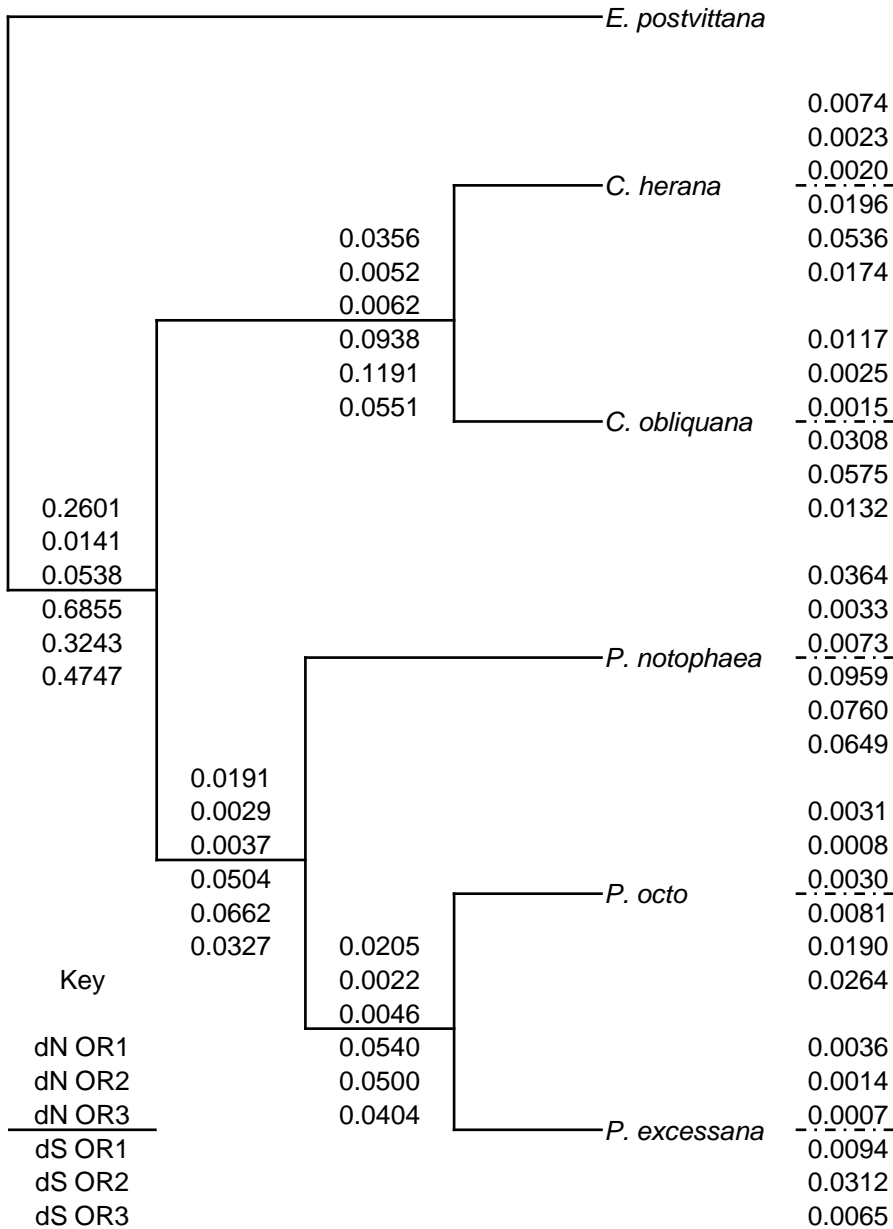

Non-synonymous and synonymous rates for all branches of OR1 , OR2 (Orco) and OR3 trees of *Ctenopseustis obliquana*, *C. herana*, *Planotortrix octo*, *P. excessana* and *P. notophaea*, with *Epiphyas postvittana* as an outgroup, plotted onto a consensus tree. Rates were calculated based on the M3 model in PAML, which has three categories of site with  $\omega$  free to vary for each site category.
